# Supplementary material
Source: PubMed Central journal article supplement (PMC5410952)
Supplement: ry151951suppa1.pdf [file ry151951suppa1.pdf]

**Table E1. Patient Data, Tumor Properties, and BOLD Functional MR Imaging Activation Measurements**

| Patient No./Age (y)/Sex | Tumor Type | Motor Deficit | FLAIR Abnormality (cm <sup>3</sup> ) | Tumor Volume (cm <sup>3</sup> ) | Tumor Distance to the PMC | Ipsilateral PMC Gyral Volume Difference (%) | Ipsilateral PMC Relative Activation Difference (%) | Ipsilateral PMC Adjusted Activation Difference (%) |
|-------------------------|------------|---------------|--------------------------------------|---------------------------------|---------------------------|---------------------------------------------|----------------------------------------------------|----------------------------------------------------|
| 1/68/F                  | GBM        | Yes           | 9.1                                  | 10.2                            | Near                      | +81                                         | -23                                                | -67                                                |
| 2/62/M                  | GBM        | No            | 57.3                                 | 17.7                            | Near                      | +23                                         | -16                                                | -32                                                |
| 3/55/M                  | GBM        | No            | 3.1                                  | 5.9                             | Near                      | -25                                         | -66                                                | -54                                                |
| 4/61/M                  | GBM        | No            | 14.4                                 | 5.3                             | Near                      | +12                                         | +28                                                | +15                                                |
| 5/69/M                  | GBM        | No            | 21.6                                 | 15.8                            | Near                      | +12                                         | -60                                                | -65                                                |
| 6/75/M                  | GBM        | Yes           | 59.7                                 | 13.5                            | Far                       | -23                                         | -47                                                | -31                                                |
| 7/63/M                  | GBM        | Yes           | 105.7                                | 45                              | Far                       | -10                                         | -67                                                | -61                                                |
| 8/59/M                  | GBM        | No            | 16.8                                 | 17.9                            | Near                      | -7                                          | -20                                                | -15                                                |
| 9/54/F                  | GBM        | Yes           | 66.2                                 | 11.5                            | Near                      | -10                                         | -74                                                | -71                                                |
| 10/56/M                 | GBM        | No            | 7.9                                  | 35.4                            | Near                      | +32                                         | +12                                                | -15                                                |
| 11/50/F                 | GBM        | No            | 85.1                                 | 80                              | Near                      | -18                                         | -89                                                | -86                                                |
| 12/69/F                 | GBM        | Yes           | 28.2                                 | 7.6                             | Near                      | +9                                          | -65                                                | -68                                                |
| 13/61/M                 | GBM        | Yes           | 15.8                                 | 47.1                            | Near                      | +3                                          | -2                                                 | -5                                                 |
| 14/62/F                 | GBM        | No            | 9.7                                  | 3.3                             | Near                      | +5                                          | +8                                                 | +2                                                 |
| 15/77/F                 | GBM        | Yes           | 12.6                                 | 8.9                             | Near                      | +34                                         | -15                                                | -36                                                |
| 16/74/M                 | GBM        | No            | 55.1                                 | 16.3                            | Near                      | +54                                         | -30                                                | -55                                                |
| 17/60/F                 | GBM        | Yes           | 12.6                                 | 48                              | Near                      | -15                                         | -70                                                | -65                                                |
| 18/68/F                 | GBM        | No            | 33.9                                 | 40.3                            | Near                      | +48                                         | -94                                                | -96                                                |
| 19/27/M                 | GBM        | No            | 125.4                                | 45.4                            | Near                      | -3                                          | -49                                                | -48                                                |
| 20/59/M                 | GBM        | No            | 68.8                                 | 84.3                            | Far                       | -9                                          | -47                                                | -31                                                |
| Mean*                   |            |               | 40.4 ± 35.6                          | 28 ± 24.2                       |                           | +10 ± 28                                    | -39 ± 35                                           | -44 ± 30                                           |
| Range                   |            |               | 3.1-125.4                            | 3.3-84.3                        |                           | -25 To +81                                  | -94 To +28                                         | -96 To +15                                         |
| 21/55/F                 | Metastasis | No            | 20.8                                 | 14.4                            | Near                      | -12                                         | -34                                                | -25                                                |
| 22/65/M                 | Metastasis | Yes           | 74.3                                 | 6.7                             | Near                      | +47                                         | -57                                                | -71                                                |
| 23/59/M                 | Metastasis | No            | 68                                   | 2.6                             | Far                       | +15                                         | +66                                                | +44                                                |
| 24/45/M                 | Metastasis | No            | 0.7                                  | 3.2                             | Near                      | -1                                          | -6                                                 | -5                                                 |
| 25/66/M                 | Metastasis | No            | 52.1                                 | 13                              | Near                      | +10                                         | -13                                                | -21                                                |
| 26/60/M                 | Metastasis | Yes           | 51.3                                 | 2.8                             | Near                      | +68                                         | +18                                                | -30                                                |
| 27/73/M                 | Metastasis | No            | 35.6                                 | 9.3                             | Near                      | -1                                          | +31                                                | +32                                                |
| 28/68/F                 | Metastasis | Yes           | 9.5                                  | 13.1                            | Near                      | +36                                         | +14                                                | -16                                                |
| 29/64/F                 | Metastasis | Yes           | 22.8                                 | 2.8                             | Near                      | -4                                          | -41                                                | -39                                                |
| 30/55/F                 | Metastasis | No            | 57.7                                 | 1.6                             | Near                      | -4                                          | -60                                                | -58                                                |
| 31/47/M                 | Metastasis | No            | 0.4                                  | 32.5                            | Near                      | -14                                         | -18                                                | -5                                                 |
| 32/74/F                 | Metastasis | Yes           | 1.8                                  | 0.8                             | Near                      | +16                                         | +14                                                | -2                                                 |
| 33/62/F                 | Metastasis | No            | 34.2                                 | 6                               | Near                      | +30                                         | -18                                                | -36                                                |
| 34/70/M                 | Metastasis | Yes           | 14.9                                 | 5.1                             | Near                      | +6                                          | -16                                                | -20                                                |
| 35/56/M                 | Metastasis | Yes           | 99.4                                 | 8.9                             | Far                       | +9                                          | -34                                                | -39                                                |
| 36/56/M                 | Metastasis | No            | 5.7                                  | 6.7                             | Near                      | +23                                         | +9                                                 | -12                                                |
| 37/68/M                 | Metastasis | No            | 25.4                                 | 2.7                             | Far                       | +3                                          | +71                                                | +66                                                |
| 38/52/F                 | Metastasis | No            | 54.1                                 | 5.8                             | Near                      | +47                                         | -59                                                | -72                                                |

|         |            |     |           |           |      |             |            |             |
|---------|------------|-----|-----------|-----------|------|-------------|------------|-------------|
| 39/75/F | Metastasis | Yes | 0.7       | 1.1       | Near | +21         | +14        | -5          |
| 40/24/M | Metastasis | No  | 1.7       | 0.7       | Near | +12         | -29        | -37         |
| 41/54/F | Metastasis | Yes | 88.5      | 3         | Near | +32         | -39        | -54         |
| Mean *  |            |     | 34.3 ± 31 | 6.8 ± 7.2 |      | +16 ± 21    | -9 ± 37    | -19 ± 35    |
| Range   |            |     | 0.4-99.4  | 0.8-32.5  |      | -12% To +68 | -60 To +71 | -72 To +66  |
| 42/67/M | Meningioma | No  | 13.5      | 25        | Near | -19         | +65        | +105        |
| 43/60/M | Meningioma | No  | 0.9       | 14.6      | Near | -16         | -23        | -9          |
| 44/93/F | Meningioma | No  | 0.04      | 45.7      | Near | +21         | +54        | +27         |
| 45/67/F | Meningioma | No  | 37.8      | 70.1      | Far  | -19         | -28        | -11         |
| 46/64/F | Meningioma | No  | 1.9       | 11.5      | Near | +4          | -46        | -48         |
| 47/64/M | Meningioma | No  | 0.2       | 1.9       | Far  | -17         | +4         | +26         |
| 48/63/F | Meningioma | Yes | 21        | 26.5      | Near | +23         | +12        | -9          |
| 49/59/F | Meningioma | No  | 0.2       | 12.7      | Far  | -20         | -14        | +8          |
| 50/32/M | Meningioma | No  | 0.1       | 2.6       | Near | -4          | +27        | +33         |
| 51/76/M | Meningioma | No  | 84.8      | 23.6      | Near | +32         | -11        | -32         |
| 52/29/F | Meningioma | No  | 0.2       | 40.9      | Near | -23         | -7         | +21         |
| 53/62/F | Meningioma | No  | 0.1       | 4.5       | Near | -12         | +9         | +24         |
| 54/72/M | Meningioma | No  | 2.5       | 15.4      | Near | +49         | +3         | -31         |
| 55/75/F | Meningioma | No  | 33.0      | 38.4      | Near | +68         | +19        | -29         |
| 56/72/F | Meningioma | No  | 0.5       | 36.9      | Near | -1          | +6         | +7          |
| 57/63/F | Meningioma | No  | 11.6      | 6.2       | Near | +14         | +48        | +30         |
| 58/66/F | Meningioma | No  | 0.4       | 142.4     | Far  | +2          | +6         | +4          |
| 59/70/F | Meningioma | No  | 17.9      | 16.6      | Near | +45         | +2         | -30         |
| 60/56/M | Meningioma | No  | 25.4      | 11.7      | Far  | +10         | -15        | -22         |
| 61/55/F | Meningioma | No  | 4.1       | 43.1      | Far  | -9          | -25        | -18         |
| 62/66/F | Meningioma | No  | 0.1       | 40.9      | Near | +2          | -13        | -15         |
| 63/62/F | Meningioma | No  | 52.1      | 28        | Far  | -1          | -27        | -26         |
| Mean *  |            |     | 14 ± 21.7 | 30 ± 30.4 |      | +6 ± 25     | +2 ± 28    | 0 ± 34      |
| Range   |            |     | 0.04-84.8 | 1.9-142.4 |      | -23 To +68  | -46 To +65 | -48 To +105 |

\* Data are means ± standard deviations.
